# Supplementary material for: Disruption of IFN-I Signaling Promotes HER2/Neu Tumor Progression and Breast Cancer Stem Cells
Source: Oxford University Press journal article supplement (doi:10.1158/2326-6066.cir-17-0675), 2018-04-05
Supplement: 23266066cir170675-sup-193002_2_supp_4637033_p5mmmm.docx [file 23266066cir170675-sup-193002_2_supp_4637033_p5mmmm.docx]

**Supplementary Table 1 – Expression of putative CSC markers in neuT vs IFNAR-neuT tumors**

| **Putative CSC Marker(s)** | **% of expression in Lin- tumor cells**  **± Standard Deviation** | |
| --- | --- | --- |
| **neuT** | **IFNAR-neuT** |
| **CD49f/CD61** | 17±9 | 20±7 |
| **CD24/Her2** | 19±8 | 22±12 |
| **Ly6A/E (Sca-1)** | 9.5±7 | 4±1 |
| **LGR5** | 12±2 | 15±7 |
| **EPCAM** | 7±1 | 10±7 |
| **LGR/EPCAM** | 1.7±1 | 2.5±1 |
| **CD133** | 20±16 | 34±1 |
| **CD44/CD133** | 19±16 | 33±2 |
| **CD24/CD133** | 15±12 | 33±1 |
| **CD44/CD24** | 68±16 | 86±10 |
